# Supplementary material
Source: PubMed Central journal article supplement (PMC7964217)
Supplement: 1939_methods.pdf [file 1939_methods.pdf]

## Supplementary On-Line Data: Detailed Methods

### General VBM Analysis

For each section, the same linear regression model was used to assess differences between the groups. Voxel intensity ( $V$ ) was modeled as a function of group, controlling for age and TIV (an index of head size) by including them as covariates. TIV was measured as previously described.<sup>1</sup> This model is shown in equation 1, where the contrasts of interest are the 1-tailed  $t$  tests between the estimates of the group parameters,  $\beta_1 > \beta_3$  (ie, where the controls had more volume than the early HD group):

$$1) V = \beta_1 \text{ Control} + \beta_2 \text{ PM} + \beta_3 \text{ HD} + \beta_4 \text{ age} + \beta_5 \text{ TIV} + \mu + \varepsilon,$$

where  $\mu$  is a constant,  $\varepsilon$  is error, HD is early HD subjects, and PM, premanifest.

Unless otherwise stated, statistical parametric maps were corrected for multiple comparisons by using random field theory to control FWE  $P < .05$ .

### Adjusting for “Brain” Size

Three models were fitted, according to the following equations:

$$2) V = \beta_1 \text{ Control} + \beta_2 \text{ PM} + \beta_3 \text{ HD} + \beta_4 \text{ age} + \beta_5 \text{ TIV} + \mu + \varepsilon$$

$$3) V = \beta_1 \text{ Control} + \beta_2 \text{ PM} + \beta_3 \text{ HD} + \beta_4 \text{ age} + \mu + \varepsilon$$

$$4) V = \beta_1 \text{ Control} + \beta_2 \text{ PM} + \beta_3 \text{ HD} + \beta_4 \text{ age} + \beta_5 \text{ TIV} + \beta_6 \text{ GM volume} + \mu + \varepsilon.$$

Equation 2 adjusts for head size (TIV) and is the standard model used elsewhere in this article. Equation 3 does not adjust for head size, and equation 4 includes total GM volume as an additional covariate. For each model, the contrast of interest was  $\beta_1 > \beta_3$  (ie, regions in which controls had more GM than early HD subjects).

### Subgroup Analysis

Three models were fitted, according to the following equations:

$$5) V = \beta_1 \text{ Control} + \beta_2 \text{ low motor scores} + \beta_3 \text{ age} + \beta_4 \text{ TIV} + \mu + \varepsilon$$

$$6) V = \beta_1 \text{ Control} + \beta_2 \text{ high motor scores} + \beta_3 \text{ age} + \beta_4 \text{ TIV} + \mu + \varepsilon$$

$$7) V = \beta_1 \text{ low motor scores} + \beta_2 \text{ high motor scores} + \beta_3 \text{ age} + \beta_4 \text{ TIV} + \mu + \varepsilon.$$

The contrast of interest in equations 5-7 is the 1-tailed  $t$  test between the estimates of the group parameters,  $\beta_1 > \beta_2$ , so in the first model, this shows regions in which the low motor group has less GM than controls; in the second model, regions in which the high motor group has less GM than controls; and in the third model, regions in which the high motor group has less GM than the low motor group.

### General Methods

Models were fitted and parameters estimated (described in the relevant sections) at all voxels within an explicit mask that excluded any voxels for which  $>10\%$  of the images had a value of  $<0.1$ . This “majority masking” was preferred to the default “absolute” mask option in SPM, which would exclude any voxels for which 1 or more images had a value of less than 0.1 and thus perhaps be unduly influenced by a single poorly registered or highly atrophied scan.<sup>2</sup> All maps were displayed as overlays on a smoothed version of the template used for normalization; for DARTEL, this was the template produced by the DARTEL “make template” routine.

### References

1. Whitwell JL, Crum WR, Watt HC, et al. Normalization of cerebral volumes by use of intracranial volume: implications for longitudinal quantitative MR imaging. *AJNR Am J Neuroradiol*. 2001;22:1483–89
2. Ridgway GR, Omar R, Ourselin S, et al. Issues with threshold masking in voxel-based morphometry of atrophied brains. *Neuroimage* 2009;44:99–111. Epub 2008 Sep 20
